# Supplementary material for: 老人福祉サ-ビスにおける事前評価とエコマップ--ソ-シャルワ-ク実践の図式化表示の試み
Source: Royal Society of Chemistry journal article supplement (doi:10.1039/c3nr00215b), 1992-01-01
Supplement: c3nr00215b.pdf [file c3nr00215b.pdf]

*Supporting Information*

**One-pot facile synthesis of Janus-structured SnO<sub>2</sub>/CuO composite nanorods and their application as anode materials in Li-ion batteries**

Seung Ho Choi and Yun Chan Kang<sup>\*</sup>

Department of Chemical Engineering, Konkuk University, 1 Hwayang-dong, Gwangjin-gu, Seoul  
143-701, Korea

**This file includes:**

- Schematic diagram of flame spray pyrolysis process.
- The SEM images of the SnO<sub>2</sub>/CuO (70/30) composite powders collected at different heights of the flame.
- Initial charge curves of the pure SnO<sub>2</sub> and Janus-structured SnO<sub>2</sub>/CuO composite powders at different current densities.
- The morphologies of SnO<sub>2</sub> nanorods formed from the SnO<sub>2</sub>/CuO composite powders.

### Flame spray pyrolysis process.

The schematic diagram of the flame spray pyrolysis process was shown in Fig. S1. The flame spray pyrolysis system consisted of a droplet generator, flame nozzle, powder collector, and blower. An ultrasonic spray generator (1.7 MHz) with 6 resonators was used to generate droplets that were carried into the high-temperature diffusion flame by oxygen, which acted as the carrier gas. Propane and oxygen acted as the fuel and oxidizer, respectively to create the diffusion flame. The flame nozzle consisted of five concentric pipes. The droplets generated from the precursor solution were supplied to the diffusion flame through the central pipe by the carrier gas. The flow rates of the fuel, oxidizer and carrier gases were maintained at 5, 40, and 10 L min<sup>-1</sup>, respectively.

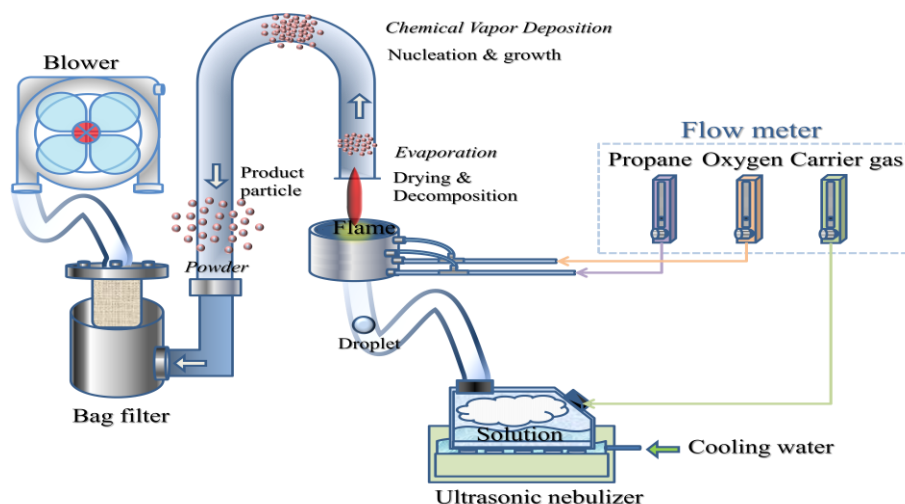

**Fig. S1.** Schematic diagram of the flame spray pyrolysis process.

The SEM images of the SnO<sub>2</sub>/CuO (70/30) composite powders collected at different heights of the flame.

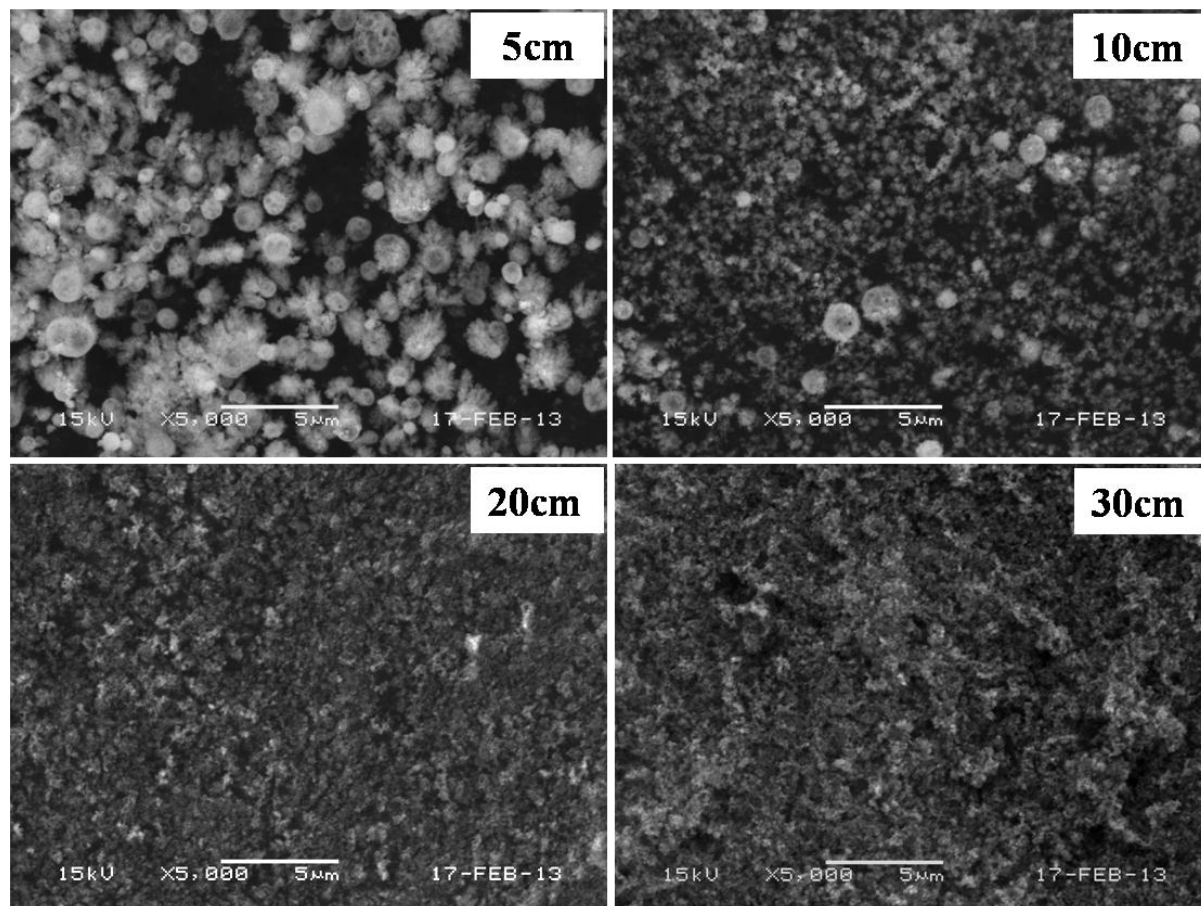

**Fig. S2.** The SEM images of the SnO<sub>2</sub>/CuO (70/30) composite powders collected at different heights of the flame.

### The initial charge curves of the pure SnO<sub>2</sub> and Janus-structured SnO<sub>2</sub>/CuO composite powders.

Fig. S3. shows the initial charge curves of the pure SnO<sub>2</sub> and Janus-structured SnO<sub>2</sub>/CuO composite powders at different current densities in the voltage range of 0.001–1 V. The pure SnO<sub>2</sub> and Janus-structured SnO<sub>2</sub>/CuO composite powders had similar shapes initial charge curves irrespective of current densities. However, the Janus-structured SnO<sub>2</sub>/CuO composite powders had better rate performances than the pure SnO<sub>2</sub> powders.

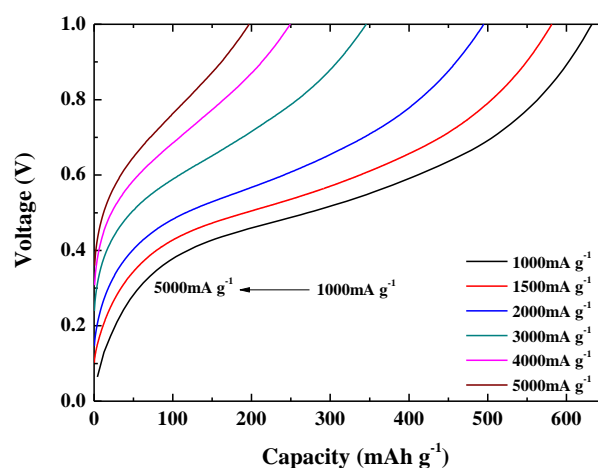

(a) SnO<sub>2</sub>/CuO (100/0)

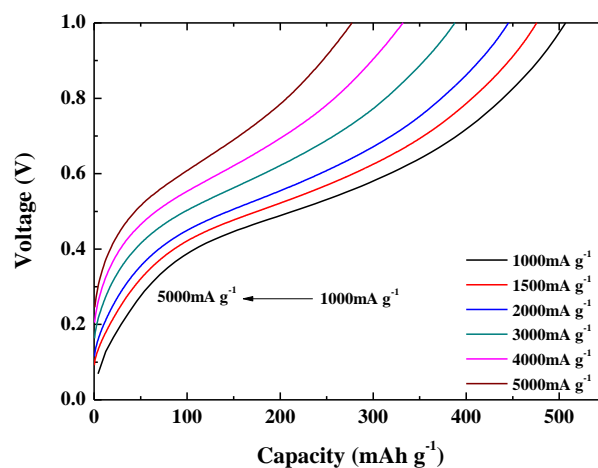

(b) SnO<sub>2</sub>/CuO (70/30)

**Fig. S3.** The initial charge curves of the pure SnO<sub>2</sub> and Janus-structured SnO<sub>2</sub>/CuO composite powders at different current densities in the voltage range of 0.001–1 V. C=capacity, V=voltage, I = current.

**The morphologies of SnO<sub>2</sub> nanorods formed from the SnO<sub>2</sub>/CuO composite powders.** Fig. S4. shows the morphologies of SnO<sub>2</sub> nanorods formed from the Janus-structured SnO<sub>2</sub>/CuO composite powders by etching of CuO. The SnO<sub>2</sub>/CuO composite powders were immersed in diluted nitric acid solution for removal of CuO. The TEM images of the etched SnO<sub>2</sub> powders showed the well-crystalline nanorod structure.

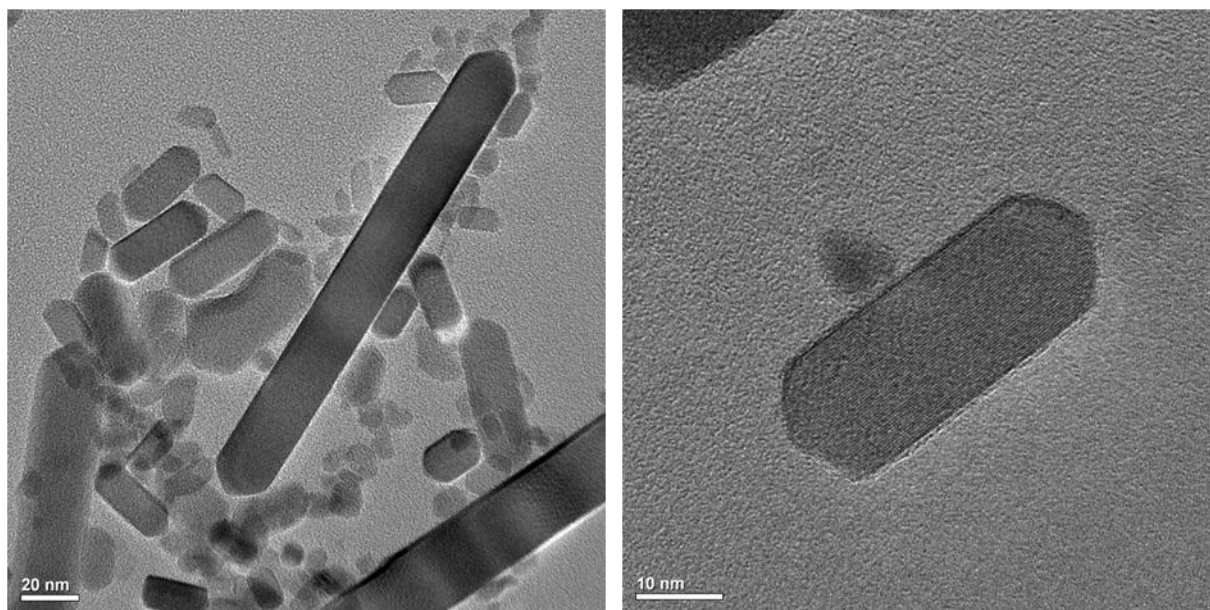

**Fig. S4.** The morphologies of SnO<sub>2</sub> nanorods formed from the Janus-structured SnO<sub>2</sub>/CuO composite powders by etching of CuO.
